# Supplementary material for: Development and validation of a nomogram for predicting the need for concomitant endoscopic septoplasty during endonasal endoscopic dacryocystorhinostomy
Source: PubMed Central journal article supplement — Quant Imaging Med Surg. 2024 Aug 5;14(9):6493–507. doi: 10.21037/qims-24-726 (PMC11400690; doi:10.21037/qims-24-726), 2024-08-05
Supplement: qims-14-09-6493-rc.pdf [file qims-14-09-6493-rc.pdf]

## TRIPOD Checklist: Prediction Model Development and Validation

| Section                   | Item |     | Checklist description                                                                                                                                                                            | Reported on Page Number/Line Number | Reported on Section/Paragraph                                                         |
|---------------------------|------|-----|--------------------------------------------------------------------------------------------------------------------------------------------------------------------------------------------------|-------------------------------------|---------------------------------------------------------------------------------------|
| <b>Title and abstract</b> |      |     |                                                                                                                                                                                                  |                                     |                                                                                       |
| Title                     | 1    | D;V | Identify the study as developing and/or validating a multivariable prediction model, the target population, and the outcome to be predicted.                                                     | 1/1-6                               | Title                                                                                 |
| Abstract                  | 2    | D;V | Provide a summary of objectives, study design, setting, participants, sample size, predictors, outcome, statistical analysis, results, and conclusions.                                          | 2-3/35-84                           | Abstract and Key summary points                                                       |
| <b>Introduction</b>       |      |     |                                                                                                                                                                                                  |                                     |                                                                                       |
| Background and objectives | 3a   | D;V | Explain the medical context (including whether diagnostic or prognostic) and rationale for developing or validating the multivariable prediction model, including references to existing models. | 4-5/87-122                          | Introduction/1-3                                                                      |
|                           | 3b   | D;V | Specify the objectives, including whether the study describes the development or validation of the model or both.                                                                                | 6/123-125                           | Introduction/4                                                                        |
| <b>Methods</b>            |      |     |                                                                                                                                                                                                  |                                     |                                                                                       |
| Source of data            | 4a   | D;V | Describe the study design or source of data (e.g., randomized trial, cohort, or registry data), separately for the development and validation data sets, if applicable.                          | 6/129-136                           | Study design and populations/1                                                        |
|                           | 4b   | D;V | Specify the key study dates, including start of accrual; end of accrual; and, if applicable, end of follow-up.                                                                                   | 10/218-226                          | Follow-Up/1                                                                           |
| Participants              | 5a   | D;V | Specify key elements of the study setting (e.g., primary care, secondary care, general population) including number and location of centers.                                                     | 6/129-136                           | Study design and populations/1                                                        |
|                           | 5b   | D;V | Describe eligibility criteria for participants.                                                                                                                                                  | 6-7/137-150                         | Study design and populations/2                                                        |
|                           | 5c   | D;V | Give details of treatments received, if relevant.                                                                                                                                                | 7-8;9-10/151-168;208-217            | Computed tomography dacryocystography (CT-DCC) image acquisition and Surgery method/1 |
| Outcome                   | 6a   | D;V | Clearly define the outcome that is predicted by the prediction model, including how and when assessed.                                                                                           | 12-13/270-293                       | Comparison of CT measurement parameters and the radiological features/1               |

|             |    |     |                                                                                                                                               |                          |                                                                                                                                  |
|-------------|----|-----|-----------------------------------------------------------------------------------------------------------------------------------------------|--------------------------|----------------------------------------------------------------------------------------------------------------------------------|
|             | 6b | D;V | Report any actions to blind assessment of the outcome to be predicted.                                                                        | N/A (Not Applicable)     | N/A (Not Applicable) This study did not adopt the blind method                                                                   |
| Predictors  | 7a | D;V | Clearly define all predictors used in developing or validating the multivariable prediction model, including how and when they were measured. | 6-7/137-150; 8-9/169-207 | Methods/ Study design and populations/2; Image analysis/1-2                                                                      |
|             | 7b | D;V | Report any actions to blind assessment of predictors for the outcome and other predictors.                                                    | N/A (Not Applicable)     | N/A (Not Applicable) This study did not adopt the blind method                                                                   |
| Sample size | 8  | D;V | Explain how the study size was arrived at.                                                                                                    | N/A (Not Applicable)     | N/A(In this study, the sample size was estimated based on the literature of previous prediction models and the 10 × events rule) |

|                              |     |     |                                                                                                                                                                                                       |                              |                                                        |
|------------------------------|-----|-----|-------------------------------------------------------------------------------------------------------------------------------------------------------------------------------------------------------|------------------------------|--------------------------------------------------------|
| Missing data                 | 9   | D;V | Describe how missing data were handled (e.g., complete-case analysis, single imputation, multiple imputation) with details of any imputation method.                                                  | N/A (no missing data)        | N/A (no missing data)                                  |
| Statistical analysis methods | 10a | D   | Describe how predictors were handled in the analyses.                                                                                                                                                 | 10-11/228-249                | Statistical analysis/1                                 |
|                              | 10b | D   | Specify type of model, all model-building procedures (including any predictor selection), and method for internal validation.                                                                         | 13-14/294-312                | Variable selection and prediction model construction/1 |
|                              | 10c | V   | For validation, describe how the predictions were calculated.                                                                                                                                         | 14-15/313-321                | Validation and performance of nomogram/1               |
|                              | 10d | D;V | Specify all measures used to assess model performance and, if relevant, to compare multiple models.                                                                                                   | 14-15/313-321                | Validation and performance of nomogram/1               |
|                              | 10e | V   | Describe any model updating (e.g., recalibration) arising from the validation, if done.                                                                                                               | 14-15/313-321                | Validation and performance of nomogram/1               |
| Risk groups                  | 11  | D;V | Provide details on how risk groups were created, if done.                                                                                                                                             | 9-10/208-217                 | Surgery method/1                                       |
| Development vs. validation   | 12  | V   | For validation, identify any differences from the development data in setting, eligibility criteria, outcome, and predictors.                                                                         | 6-7/137-150                  | Study design and populations/2                         |
| <b>Results</b>               |     |     |                                                                                                                                                                                                       |                              |                                                        |
| Participants                 | 13a | D;V | Describe the flow of participants through the study, including the number of participants with and without the outcome and, if applicable, a summary of the follow-up time. A diagram may be helpful. | 6-7/137-150<br>11-12/251-269 | Study design and populations/2<br>Results/1;Figure 1   |
|                              | 13b | D;V | Describe the characteristics of the participants (basic demographics, clinical features, available predictors), including the number of participants with missing data for predictors and outcome.    | 11-12/251-269                | Results/1                                              |
|                              | 13c | V   | For validation, show a comparison with the development data of the distribution of important variables (demographics, predictors and outcome).                                                        | 11-12/251-269                | Results/1;Table 1                                      |
| Model development            | 14a | D   | Specify the number of participants and outcome events in each analysis.                                                                                                                               | 11-12/251-269                | Results/1; Table S1                                    |

|                     |     |     |                                                                                                                                                                             |               |                                                        |
|---------------------|-----|-----|-----------------------------------------------------------------------------------------------------------------------------------------------------------------------------|---------------|--------------------------------------------------------|
|                     | 14b | D   | If done, report the unadjusted association between each candidate predictor and outcome.                                                                                    | 11-12/251-269 | Results/1; Table S1                                    |
| Model specification | 15a | D   | Present the full prediction model to allow predictions for individuals (i.e., all regression coefficients, and model intercept or baseline survival at a given time point). | 13-14/294-312 | Variable selection and prediction model construction/1 |
|                     | 15b | D   | Explain how to use the prediction model.                                                                                                                                    | 13-14/294-312 | Variable selection and prediction model construction/1 |
| Model performance   | 16  | D;V | Report performance measures (with CIs) for the prediction model.                                                                                                            | 13-14/294-312 | Variable selection and prediction model construction/1 |
| Model-updating      | 17  | V   | If done, report the results from any model updating (i.e., model specification, model performance).                                                                         | 14-15/313-321 | Validation and performance of nomogram/1               |
| <b>Discussion</b>   |     |     |                                                                                                                                                                             |               |                                                        |
| Limitations         | 18  | D;V | Discuss any limitations of the study (such as nonrepresentative sample, few events per predictor, missing data).                                                            | 19/414-421    | Discussion/6                                           |

|                           |     |     |                                                                                                                                                    |                             |                                                        |
|---------------------------|-----|-----|----------------------------------------------------------------------------------------------------------------------------------------------------|-----------------------------|--------------------------------------------------------|
| Interpretation            | 19a | V   | For validation, discuss the results with reference to performance in the development data, and any other validation data.                          | 14-15/335-359               | Discussion/2-3                                         |
|                           | 19b | D;V | Give an overall interpretation of the results, considering objectives, limitations, and results from similar studies, and other relevant evidence. | 15-19/324-408               | Discussion/1-4                                         |
| Implications              | 20  | D;V | Discuss the potential clinical use of the model and implications for future research.                                                              | 19/409-413<br>19-20/424-432 | Discussion/5;<br>Conclusion/1                          |
| <b>Other information</b>  |     |     |                                                                                                                                                    |                             |                                                        |
| Supplementary information | 21  | D;V | Provide information about the availability of supplementary resources, such as study protocol, Web calculator, and data sets.                      | 13-14/294-312               | Variable selection and prediction model construction/1 |
| Funding                   | 22  | D;V | Give the source of funding and the role of the funders for the present study.                                                                      | 20/447-449                  | Acknowledgements                                       |

\* Items relevant only to the development of a prediction model are denoted by D, items relating solely to a validation of a prediction model are denoted by V, and items relating to both are denoted D;V. We recommend using the TRIPOD Checklist in conjunction with the TRIPOD Explanation and Elaboration document.

Article information: <https://dx.doi.org/10.21037/qims-24-726>

\*As the checklist was provided upon initial submission, the page number/line number reported may be changed due to copyediting and may not be referable in the published version. In this case, the section/paragraph may be used as an alternative reference.
