# Supplementary material for: Development and validation of a nomogram for predicting the need for concomitant endoscopic septoplasty during endonasal endoscopic dacryocystorhinostomy
Source: PubMed Central journal article supplement — Quant Imaging Med Surg. 2024 Aug 5;14(9):6493–507. doi: 10.21037/qims-24-726 (PMC11400690; doi:10.21037/qims-24-726), 2024-08-05
Supplement: qims-14-09-6493-supplementary.pdf [file qims-14-09-6493-supplementary.pdf]

**Table S1** Demographic characteristics and CT-DCG parameters in the training cohort and validation cohort

| Characteristic                                                     | Training cohort                    |                                |                     | Internal test cohort              |                                |         |
|--------------------------------------------------------------------|------------------------------------|--------------------------------|---------------------|-----------------------------------|--------------------------------|---------|
|                                                                    | En-DCR without septoplasty (N=122) | En-DCR with septoplasty (N=35) | P value             | En-DCR without septoplasty (N=50) | En-DCR with septoplasty (N=18) | P value |
| Sex, n (%)                                                         |                                    |                                | 0.393               |                                   |                                | 0.323   |
| Female                                                             | 108 (88.5)                         | 29 (82.9)                      |                     | 38 (76.0)                         | 16 (88.9)                      |         |
| Male                                                               | 14 (11.5)                          | 6 (17.1)                       |                     | 12 (24.0)                         | 2 (11.1)                       |         |
| Age (years), mean ± SD                                             | 57±13                              | 56±12                          | 0.601               | 56±12                             | 56±14                          | 0.916   |
| Surgery eye, n (%)                                                 |                                    |                                | 0.360               |                                   |                                | 0.029*  |
| Right eye                                                          | 59 (48.4)                          | 20 (57.1)                      |                     | 24 (48.0)                         | 14 (77.8)                      |         |
| Left eye                                                           | 63 (51.6)                          | 15 (42.9)                      |                     | 26 (52.0)                         | 4 (22.2)                       |         |
| Symptom duration (month), median (IQR)                             | 24 (12, 60)                        | 14 (8, 42)                     | 0.340               | 12 (12, 36)                       | 30 (12, 69)                    | 0.137   |
| Eye surgery and medication history, n (%)                          |                                    |                                | 0.413               |                                   |                                | >0.999  |
| Absent                                                             | 104 (85.2)                         | 32 (91.4)                      |                     | 44 (88.0)                         | 16 (88.9)                      |         |
| Lacrimal duct recanalization                                       | 18 (14.8)                          | 3 (8.6)                        |                     | 6 (12.0)                          | 2 (11.1)                       |         |
| Systemic conditions, n (%)                                         |                                    |                                | 0.310               |                                   |                                | 0.160   |
| Absent                                                             | 95 (77.9)                          | 30 (85.7)                      |                     | 39 (78.0)                         | 17 (94.4)                      |         |
| Present                                                            | 27 (22.1)                          | 5 (14.3)                       |                     | 11 (22.0)                         | 1 (5.6)                        |         |
| Vertical size of lacrimal sac (mm), n (%)                          |                                    |                                | 0.172               |                                   |                                | 0.090   |
| ≥5                                                                 | 100 (82.0)                         | 25 (71.4)                      |                     | 43 (86.0)                         | 12 (66.7)                      |         |
| <5                                                                 | 22 (18.0)                          | 10 (28.6)                      |                     | 7 (14.0)                          | 6 (33.3)                       |         |
| NSD type, n (%)                                                    |                                    |                                | 0.152               |                                   |                                | 0.455   |
| C-shaped deviation                                                 | 47 (38.5)                          | 20 (57.1)                      |                     | 17 (34.0)                         | 7 (38.9)                       |         |
| Localized deviation                                                | 58 (47.5)                          | 11 (31.4)                      |                     | 27 (54.0)                         | 7 (38.9)                       |         |
| S-shaped deviation                                                 | 17 (13.9)                          | 4 (11.4)                       |                     | 6 (12.0)                          | 4 (22.2)                       |         |
| NSD angle (degree), mean ± SD                                      | 9.3±3.4                            | 14.4±3.6                       | <0.001 <sup>a</sup> | 10.0±3.7                          | 13.9±4.3                       | 0.002*  |
| NSD height (mm), mean ± SD                                         | 17.2±5.0                           | 18.0±4.0                       | 0.334               | 17.2±5.0                          | 16.8±2.8                       | 0.693   |
| NSD location, n (%)                                                |                                    |                                | 0.052               |                                   |                                | 0.123   |
| Nonsurgical approach area                                          | 61 (50.0)                          | 11 (31.4)                      |                     | 30 (60.0)                         | 7 (38.9)                       |         |
| Surgical approach area                                             | 61 (50.0)                          | 24 (68.6)                      |                     | 20 (40.0)                         | 11 (61.1)                      |         |
| Minimal CANCA in the surgical region (mm <sup>2</sup> ), mean ± SD | 157±25                             | 138±24                         | <0.001 <sup>a</sup> | 160±26                            | 147±24                         | 0.058   |
| MNPW at the surgical side (mm), mean ± SD                          | 9.6±2.0                            | 7.3±1.9                        | <0.001 <sup>a</sup> | 9.8±1.8                           | 7.6±1.7                        | <0.001* |
| NSD direction, n (%)                                               |                                    |                                | 0.152               |                                   |                                | 0.029*  |
| Opposite side                                                      | 69 (56.6)                          | 15 (42.9)                      |                     | 26 (52.0)                         | 4 (22.2)                       |         |
| Surgical side                                                      | 53 (43.4)                          | 20 (57.1)                      |                     | 24 (48.0)                         | 14 (77.8)                      |         |
| Variations in nasal anatomy, n (%)                                 |                                    |                                | 0.197               |                                   |                                | 0.227   |
| Absent                                                             | 84 (68.9)                          | 20 (57.1)                      |                     | 38 (76.0)                         | 11 (61.1)                      |         |
| Present                                                            | 38 (31.1)                          | 15 (42.9)                      |                     | 12 (24.0)                         | 7 (38.9)                       |         |

\*, significant P value <0.05. CT-DCG, computed tomography dacryocystography; En-DCR, endonasal endoscopic dacryocystorhinostomy; SD, standard deviation; IQR, interquartile range; NSD, nasal septal deviation; CANCA, cross-sectional area of the nasal cavity airway at surgical region; MNPW, middle nasal passage width.

## ZOC EN-DCR with septoplasty risk

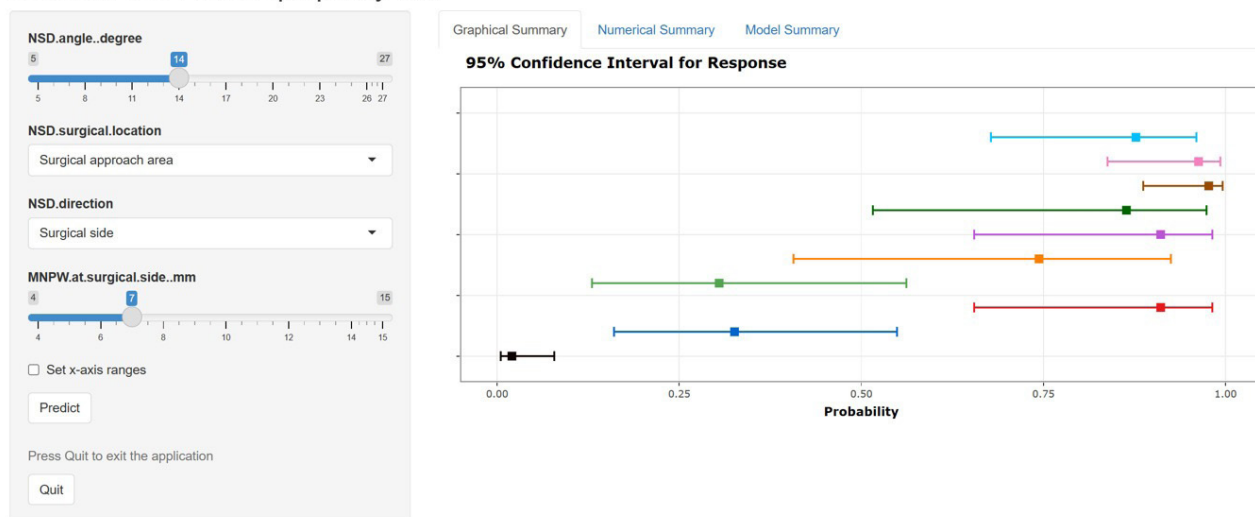

**Figure S1** A dynamic nomogram is accessible online (<https://zocdcrs.shinyapps.io/dynnomapp/>). En-DCR, endonasal endoscopic dacryocystorhinostomy; NSD, nasal septal deviation; MNPW, middle nasal passage width.
